# Supplementary material for: USP9X stabilizes XIAP to regulate mitotic cell death and chemoresistance in aggressive B‐cell lymphoma
Source: PubMed Central journal article supplement (PMC4967940; doi:10.15252/emmm.201506047), 2016-06-17

**A.I**

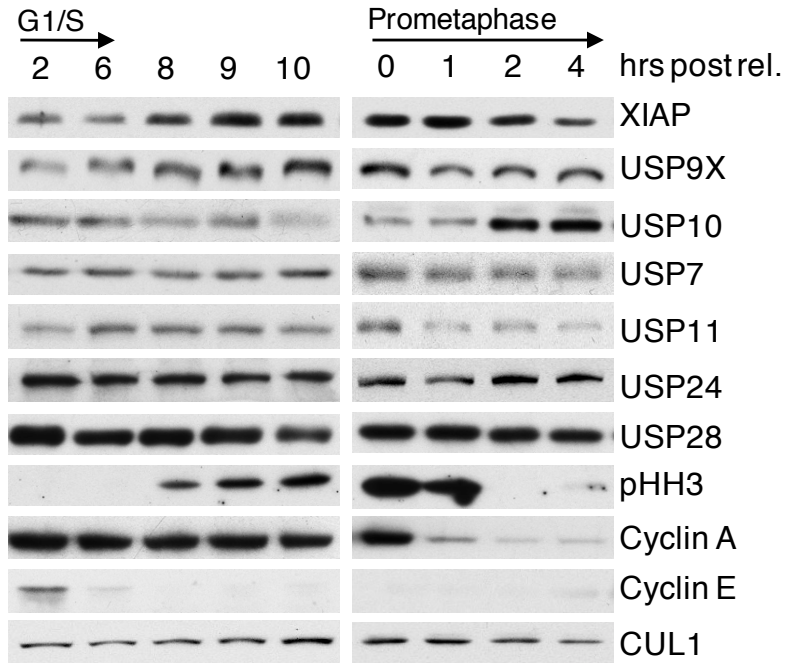

**Figure 1**

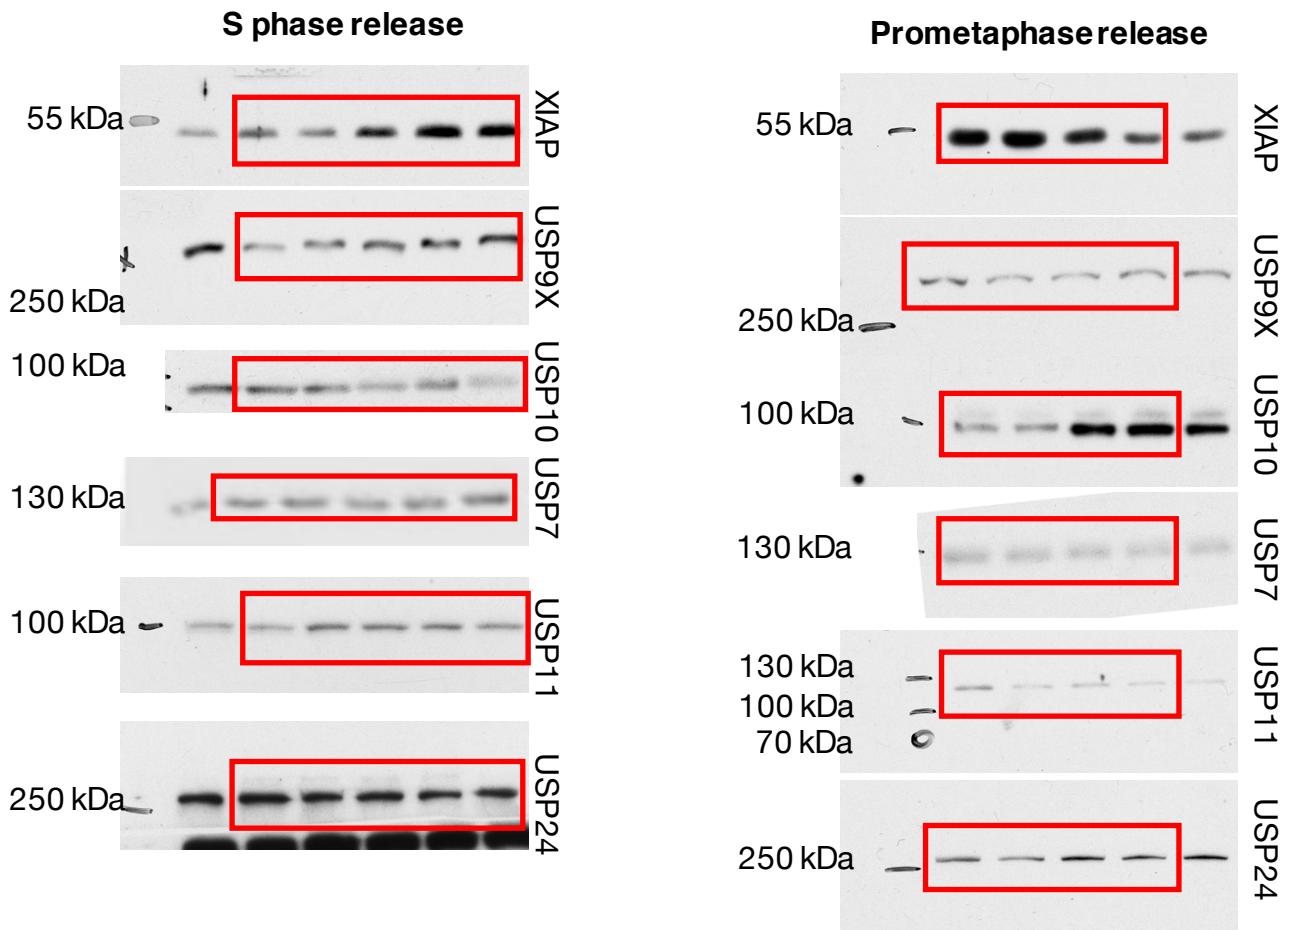

**A.II**

**Figure 1**

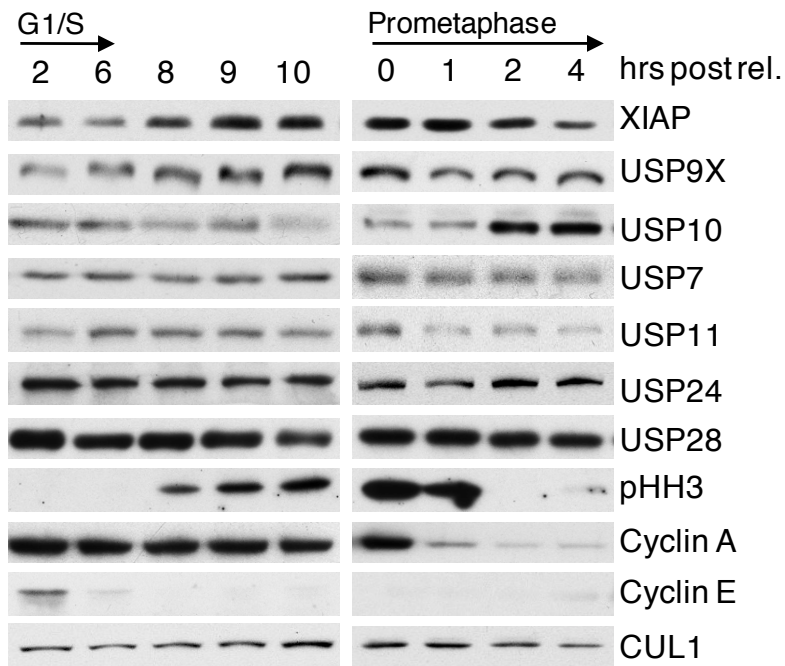

**S phase release**

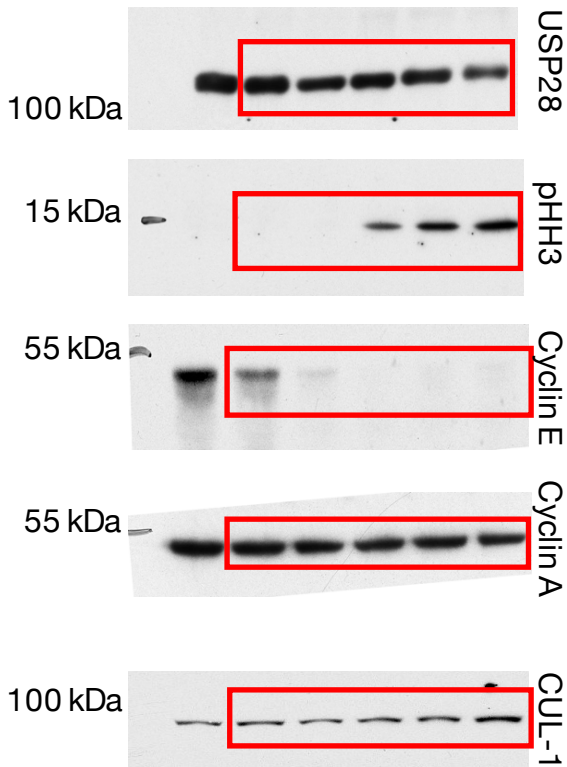

**Prometaphase release**

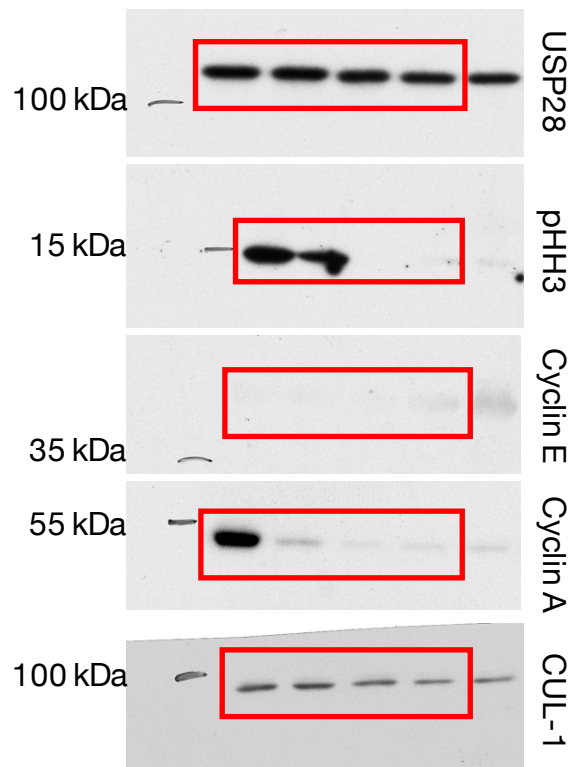

Figure 1

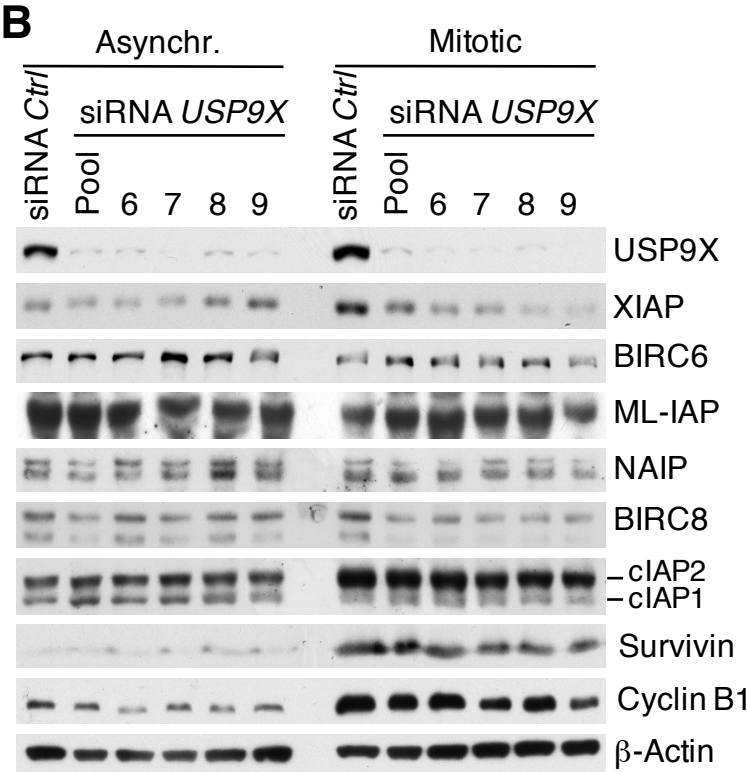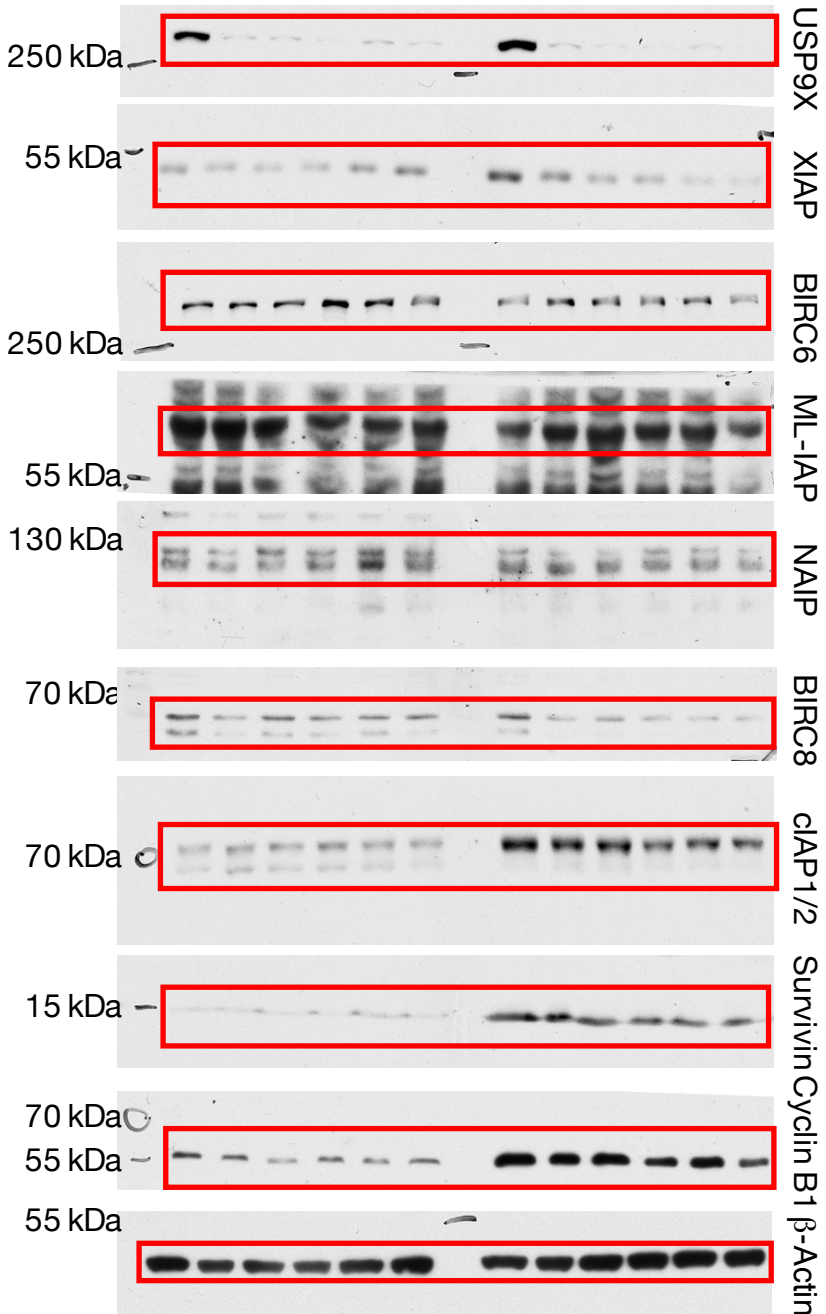

Figure 1

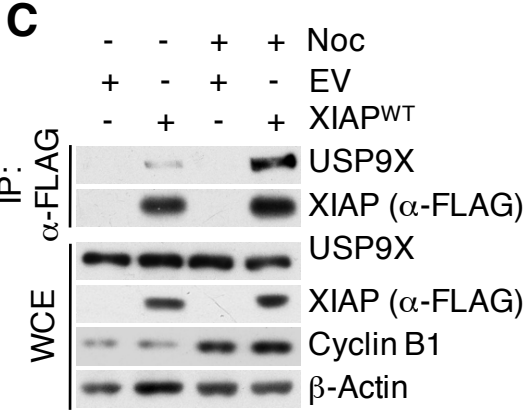

**IP:  $\alpha$ -FLAG**

**Whole Cell Eluates**

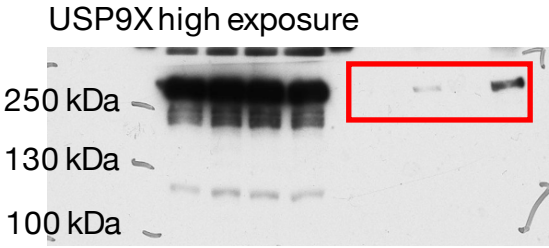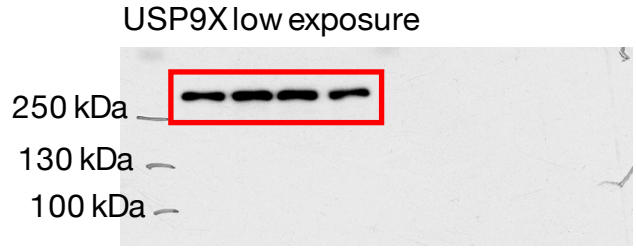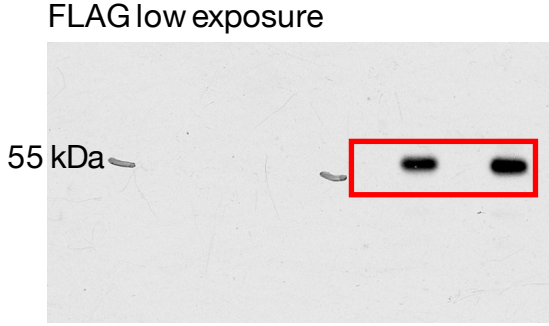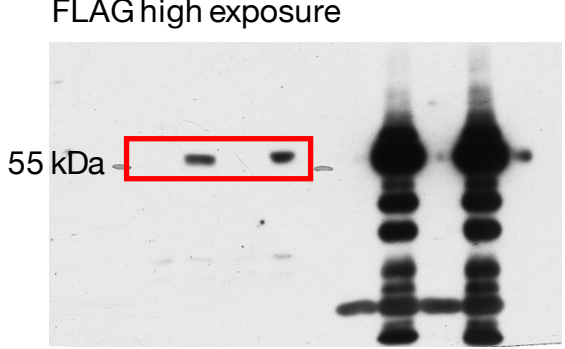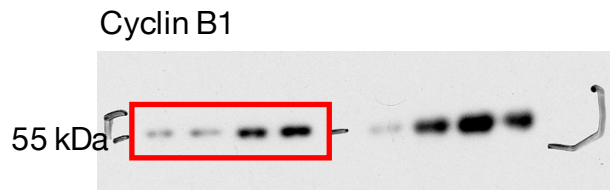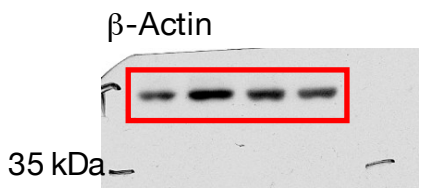

Figure 1

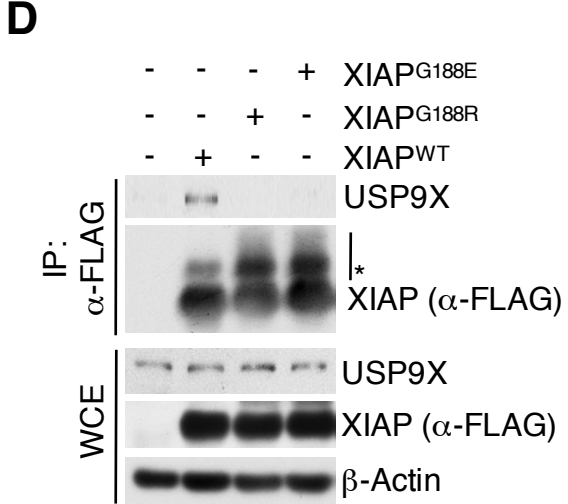

IP:  $\alpha$ -FLAG

Whole Cell Eluates

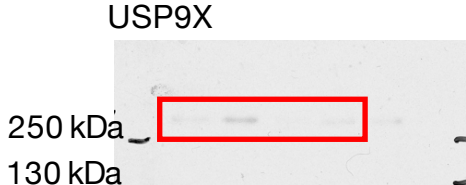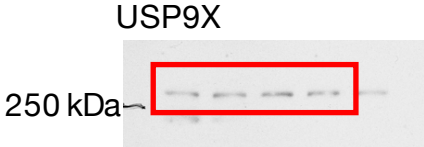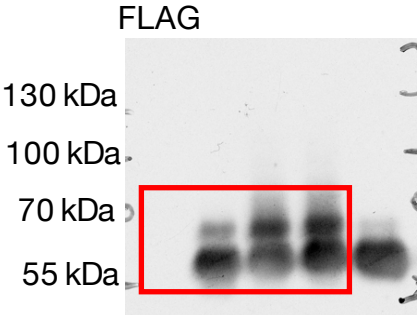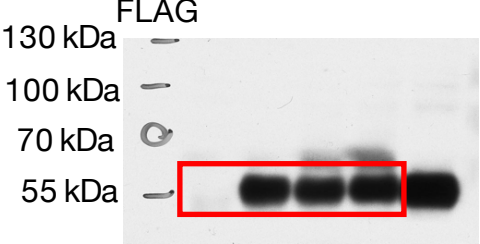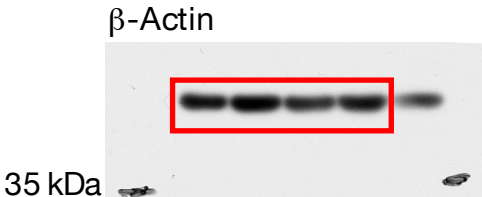

**E**

| Asynchr. |   | Mitotic |   |                    |
|----------|---|---------|---|--------------------|
| +        | + | +       | + | HA-Ubiquitin       |
| +        | + | +       | + | FLAG-XIAP          |
| +        | - | +       | - | siRNA <i>Ctrl</i>  |
| -        | + | -       | + | siRNA <i>USP9X</i> |

Figure 1

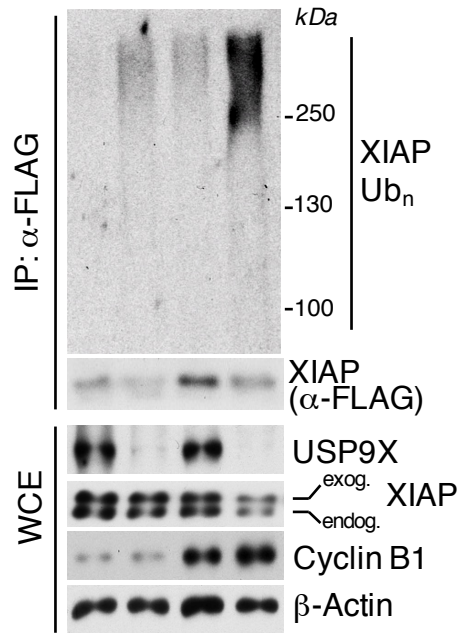IP:  $\alpha$ -FLAG

Whole Cell Eluates

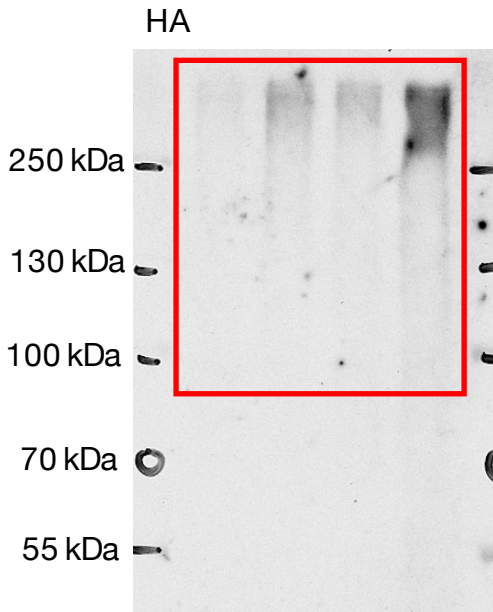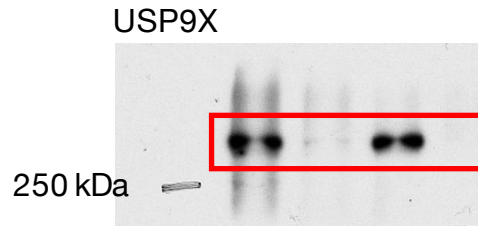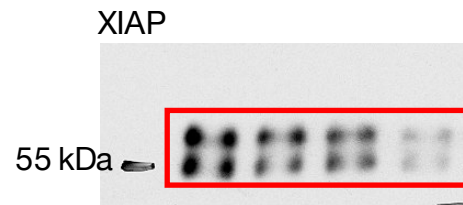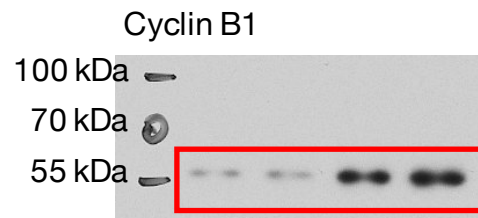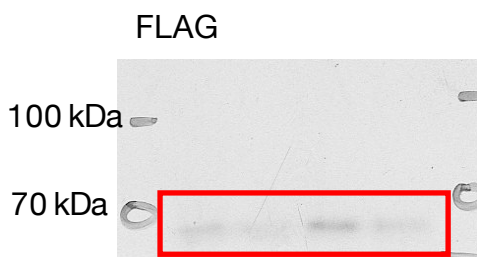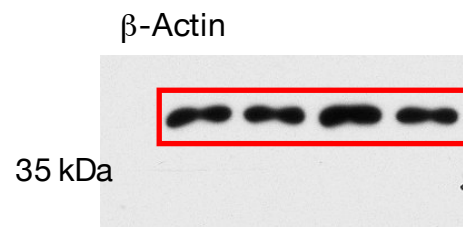

Figure 1

**F**

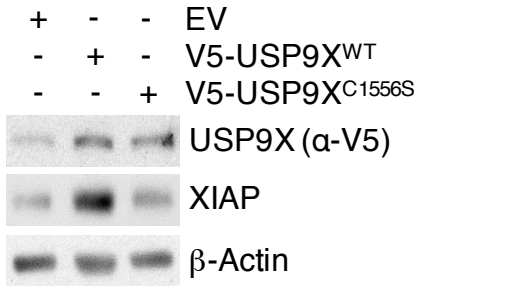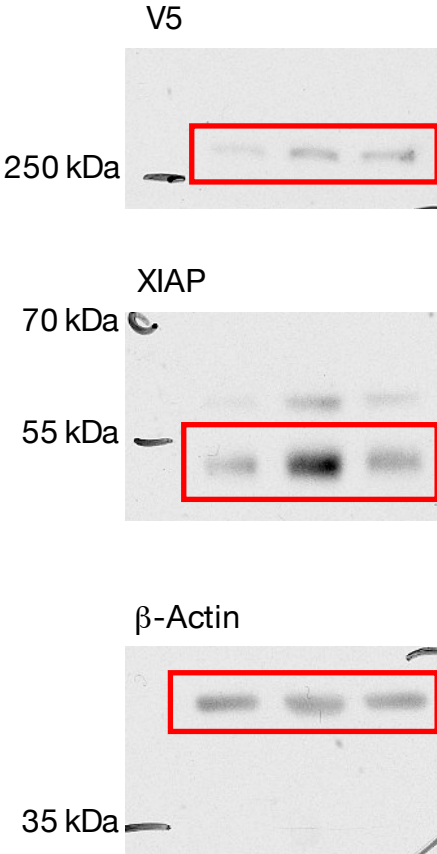

Figure 1

**G**

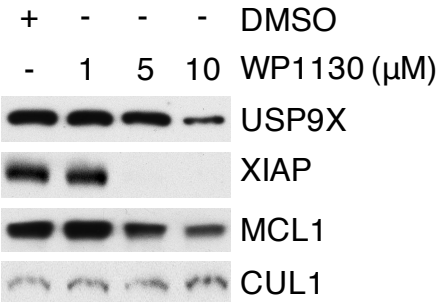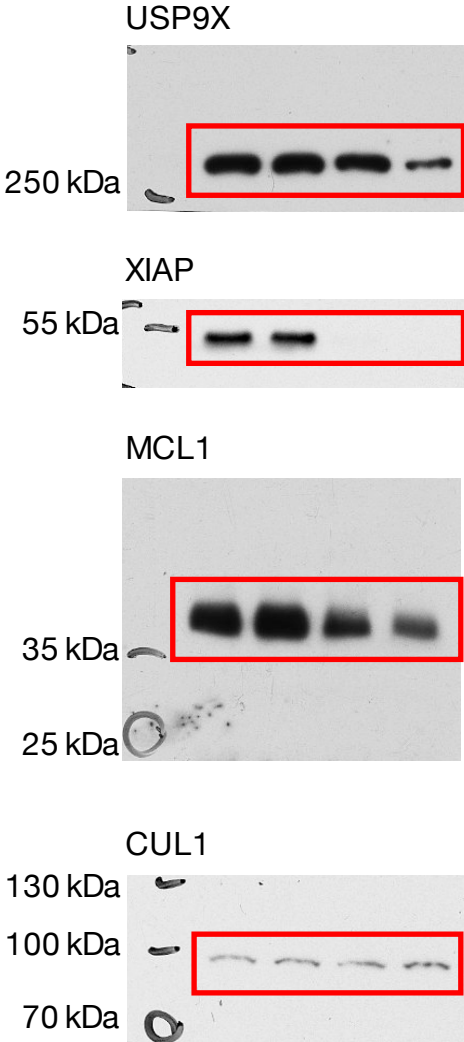

Supplement: EMMM-8-851-s004.pdf [file EMMM-8-851-s004.pdf]
