# Supplementary material for: USP9X stabilizes XIAP to regulate mitotic cell death and chemoresistance in aggressive B‐cell lymphoma
Source: PubMed Central journal article supplement (PMC4967940; doi:10.15252/emmm.201506047), 2016-06-17

Figure 2

**A.I**

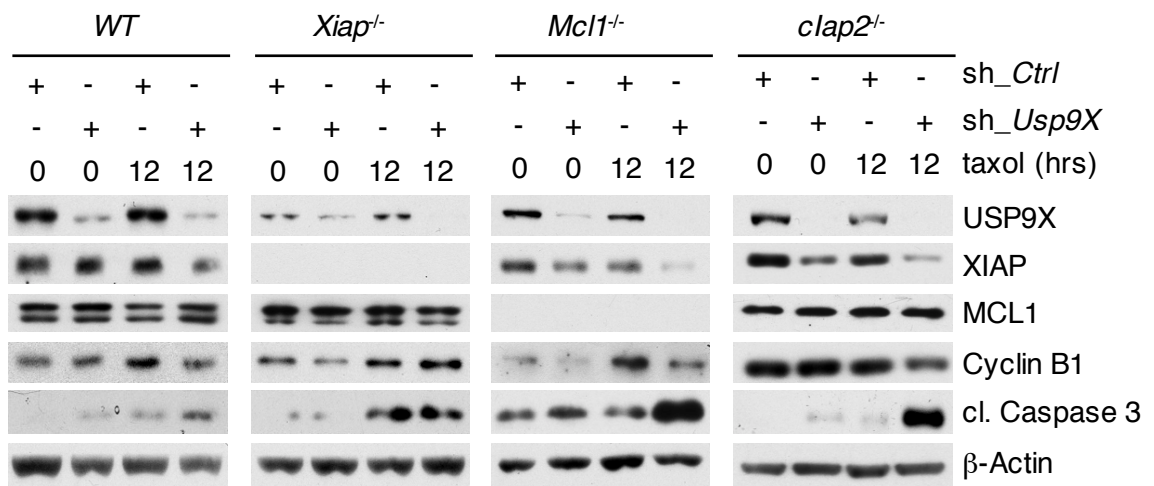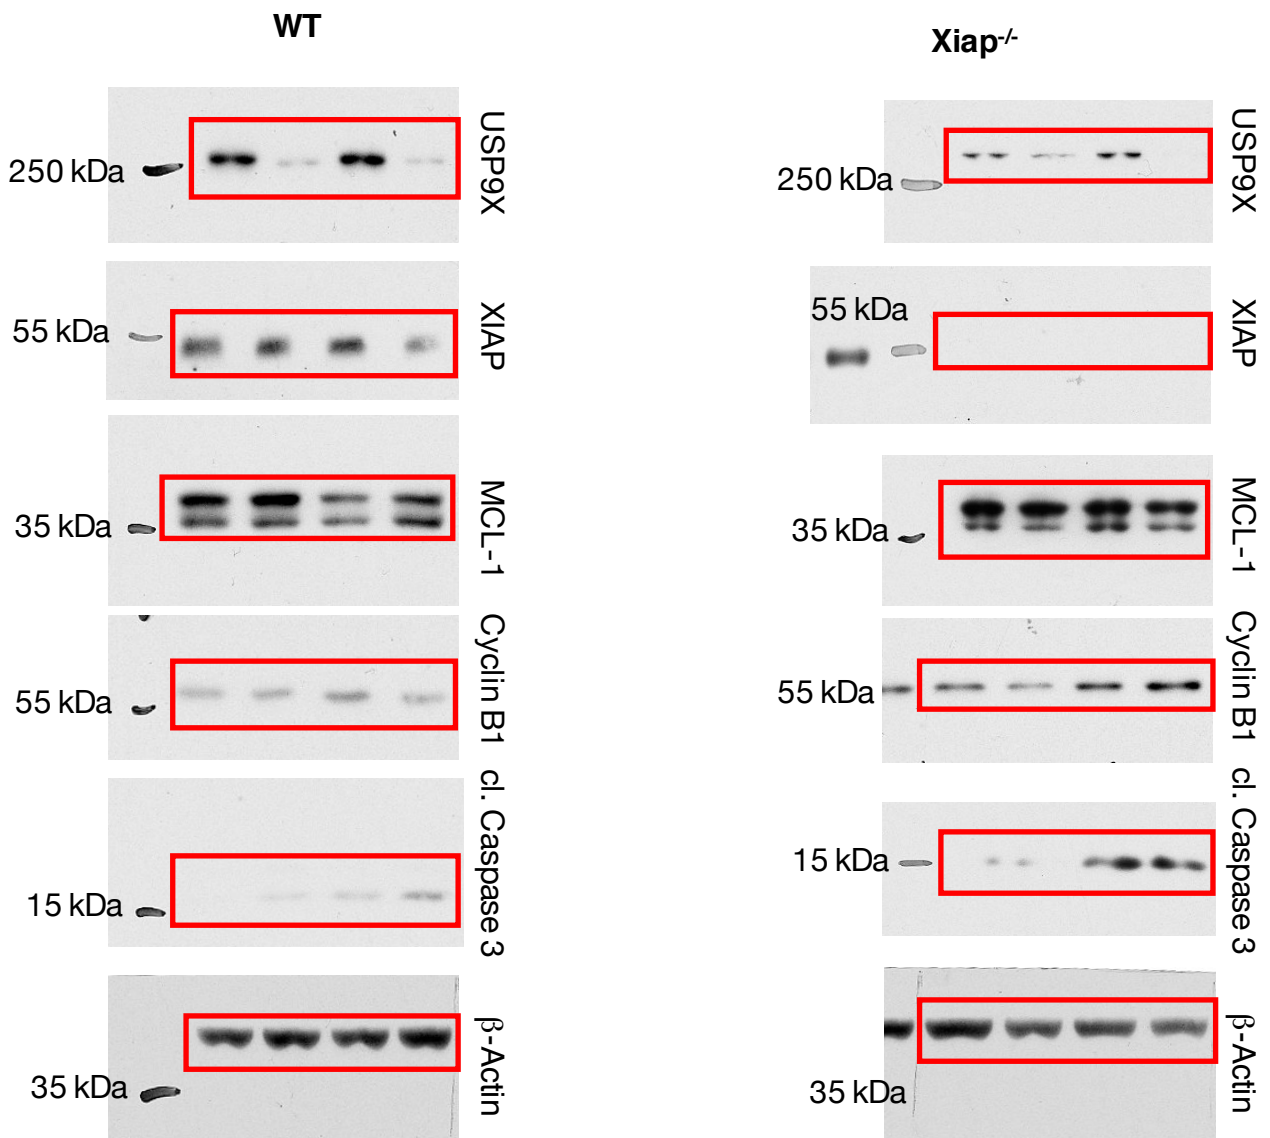

Figure 2

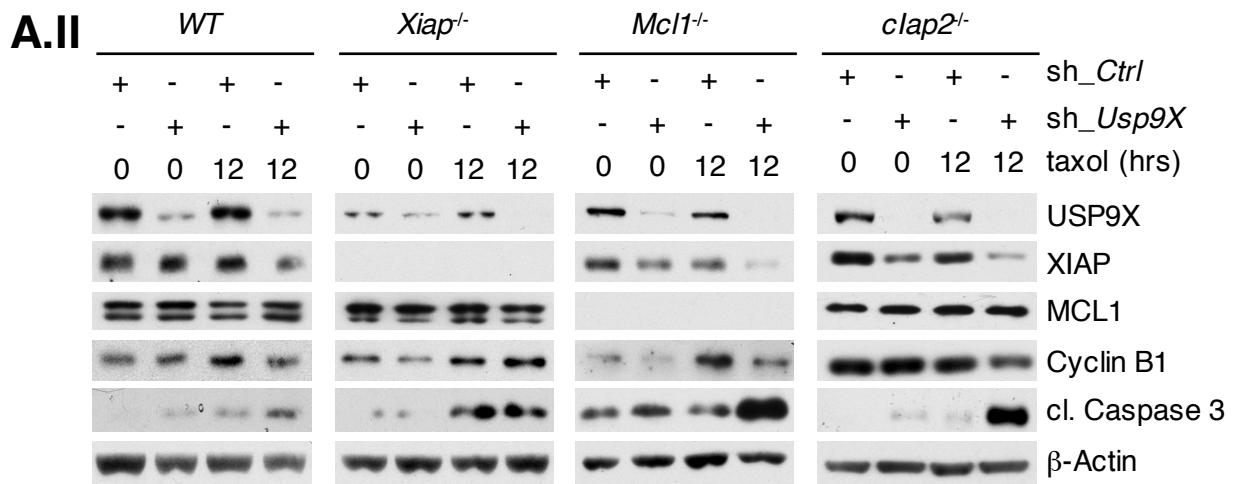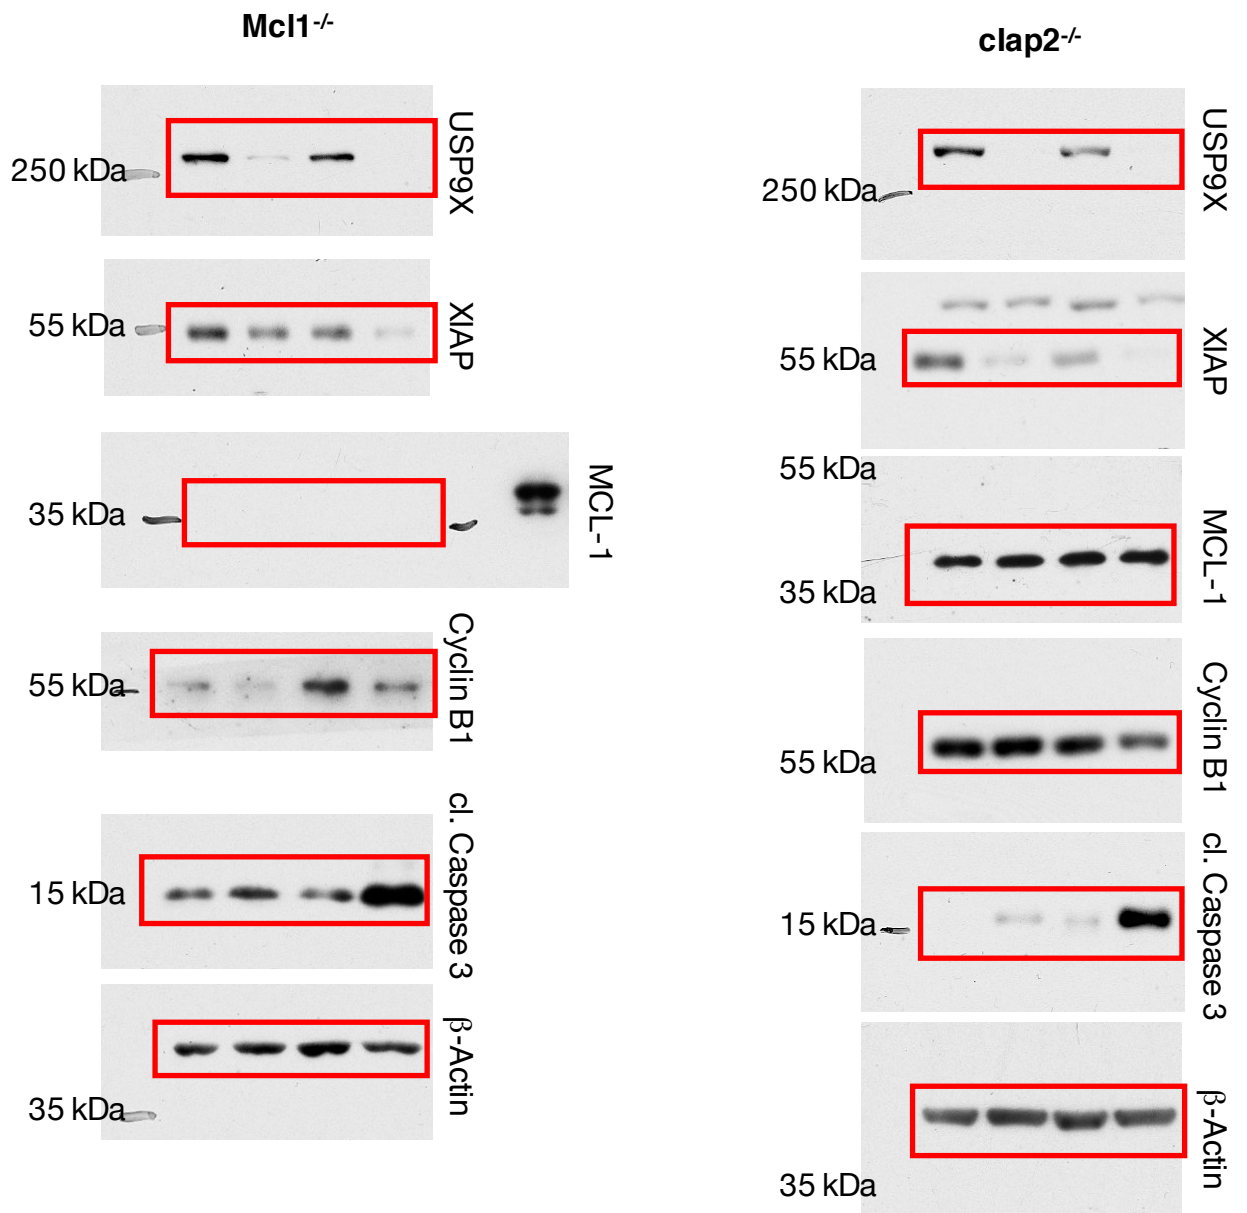

**C**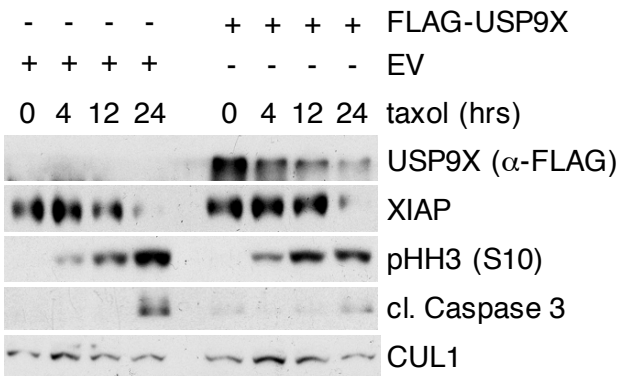**Figure 2**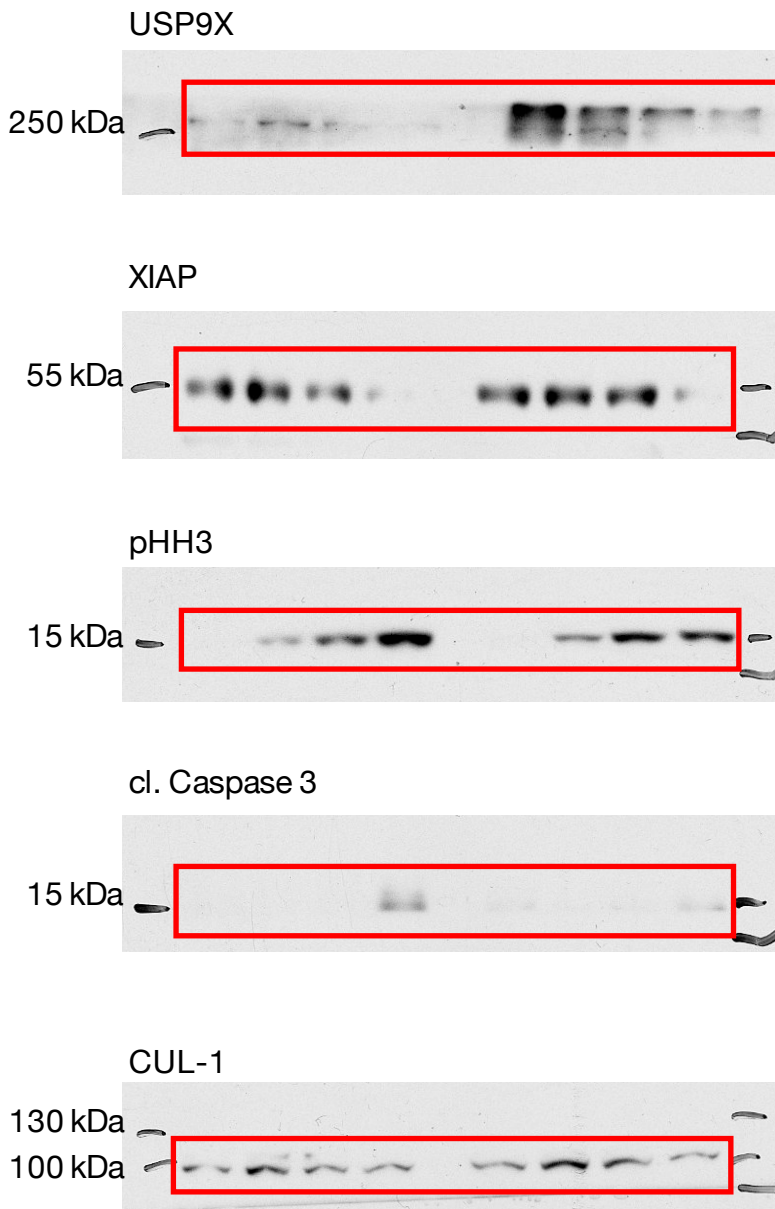

Figure 2

D

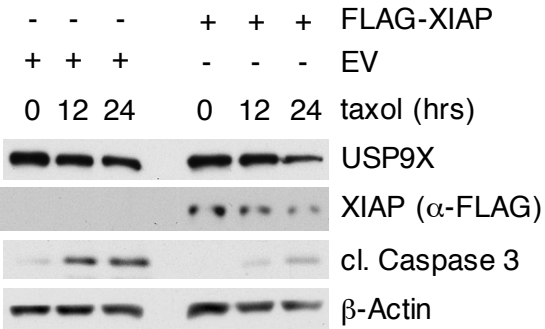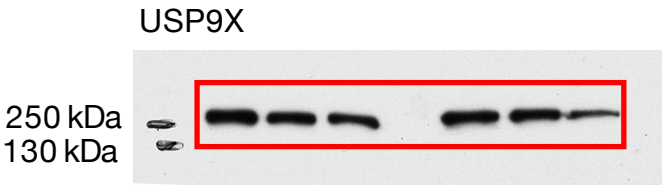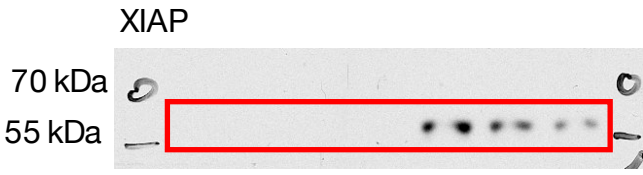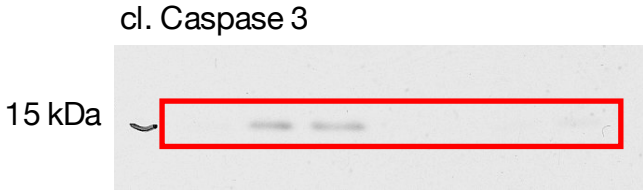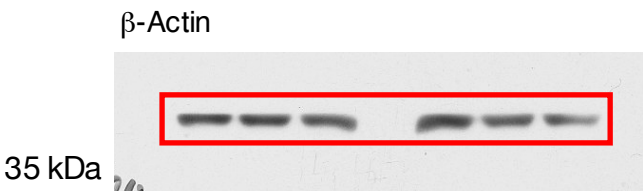

Figure 2

F

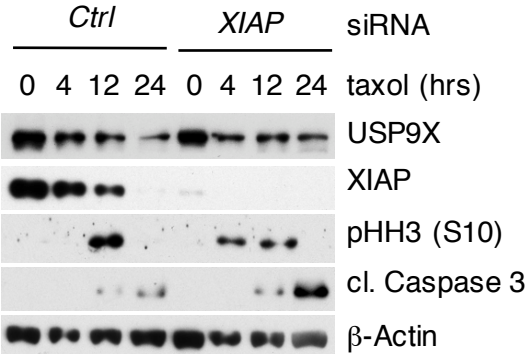

USP9X

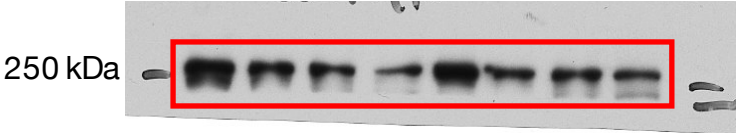

XIAP

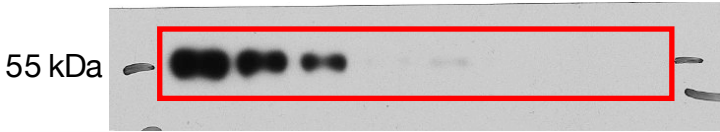

pHH3

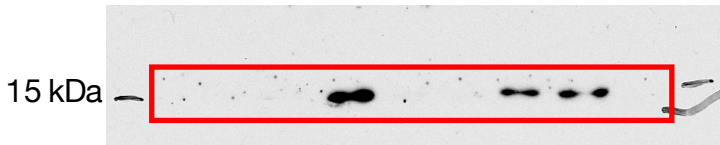

cl. Caspase 3

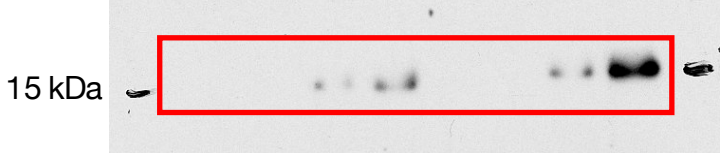

$\beta$ -Actin

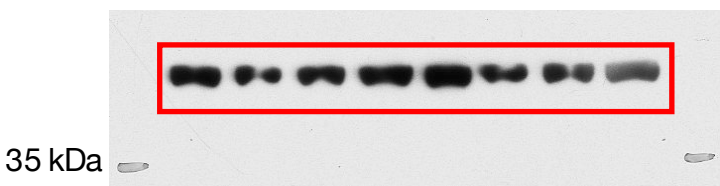

Supplement: EMMM-8-851-s005.pdf [file EMMM-8-851-s005.pdf]
