# Supplementary material for: USP9X stabilizes XIAP to regulate mitotic cell death and chemoresistance in aggressive B‐cell lymphoma
Source: PubMed Central journal article supplement (PMC4967940; doi:10.15252/emmm.201506047), 2016-06-17

Figure 3

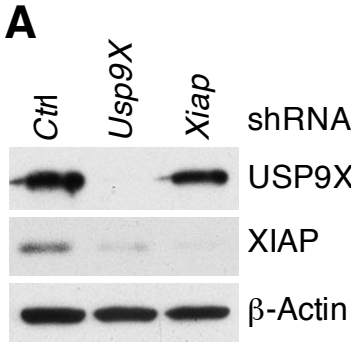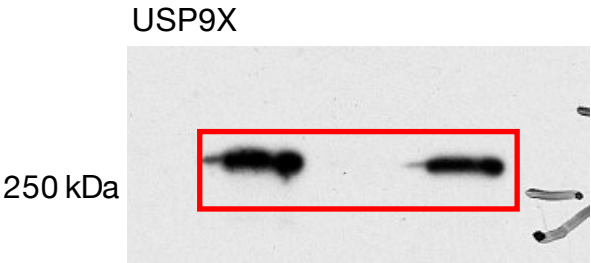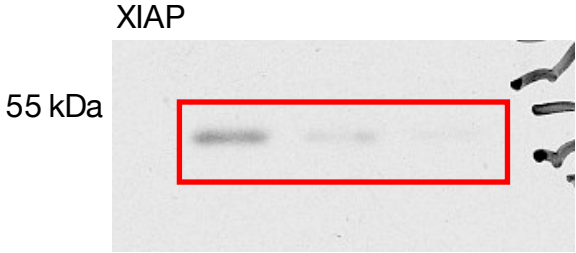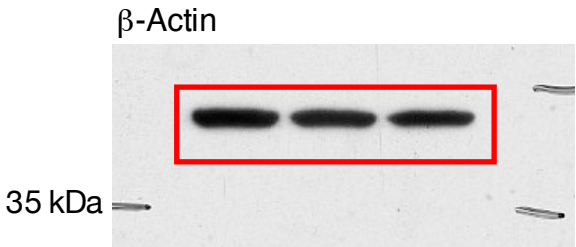

Supplement: EMMM-8-851-s006.pdf [file EMMM-8-851-s006.pdf]
