# Supplementary material for: USP9X stabilizes XIAP to regulate mitotic cell death and chemoresistance in aggressive B‐cell lymphoma
Source: PubMed Central journal article supplement (PMC4967940; doi:10.15252/emmm.201506047), 2016-06-17

Figure 4

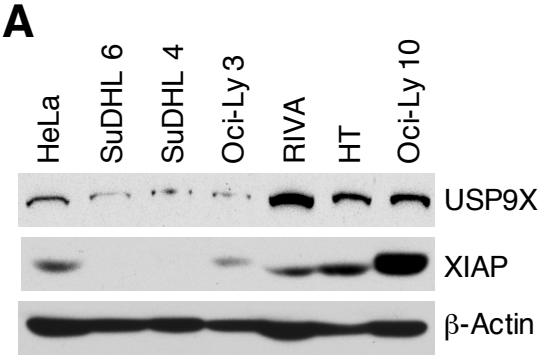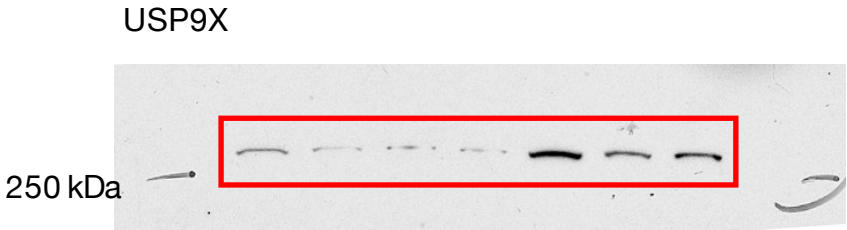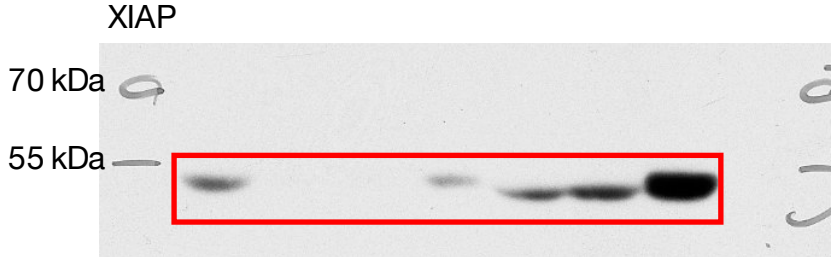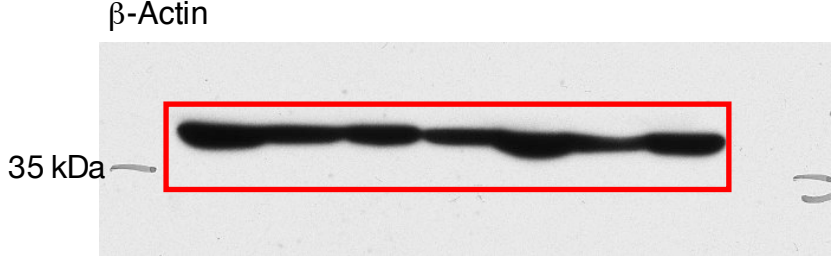

**C****Figure 4**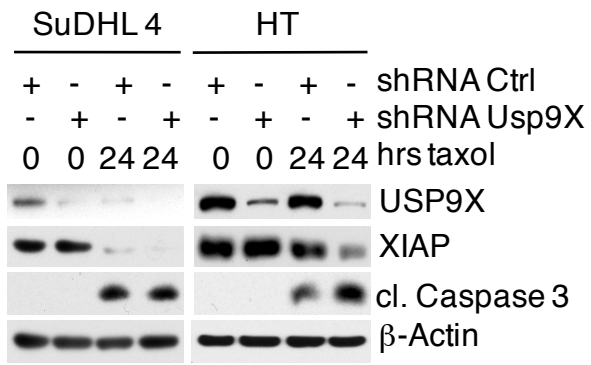**SuDHL 4****HT**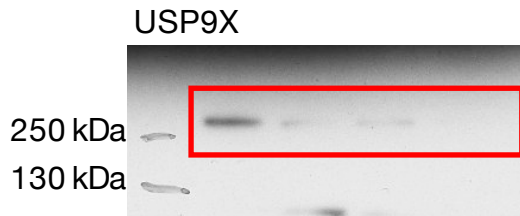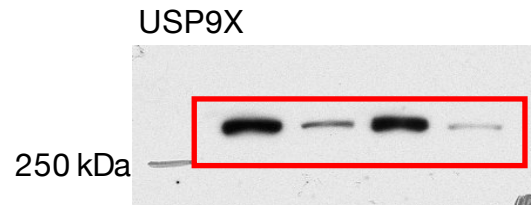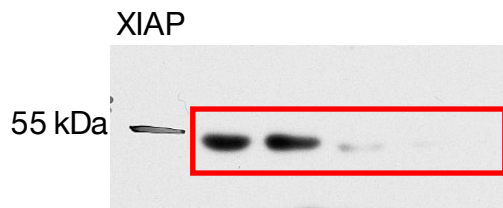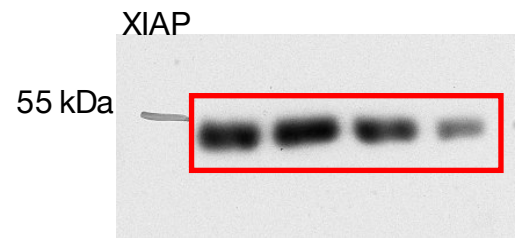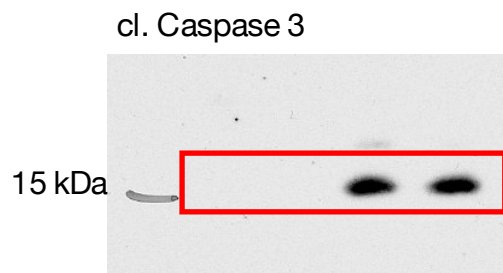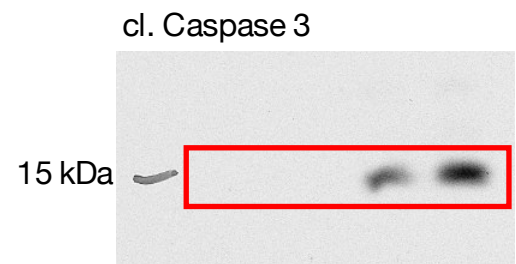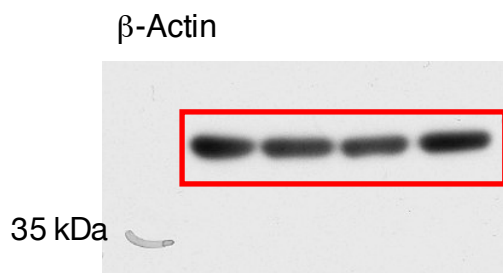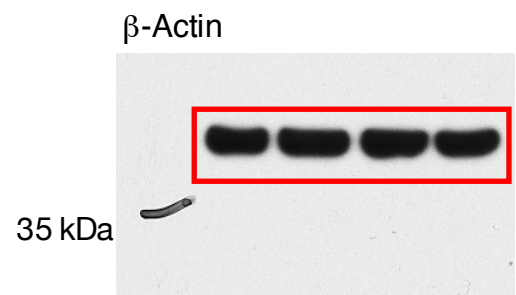

Figure 4

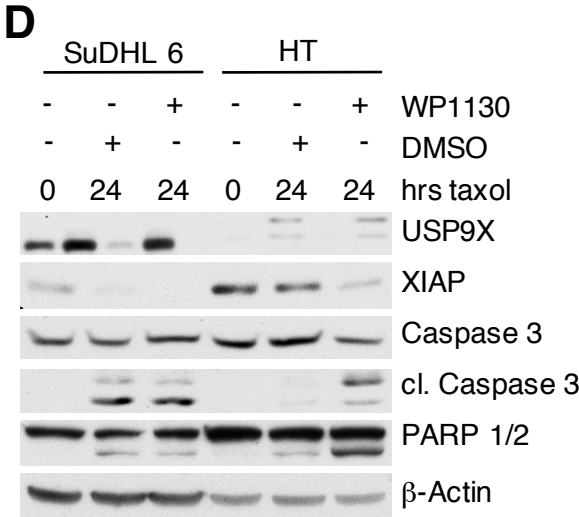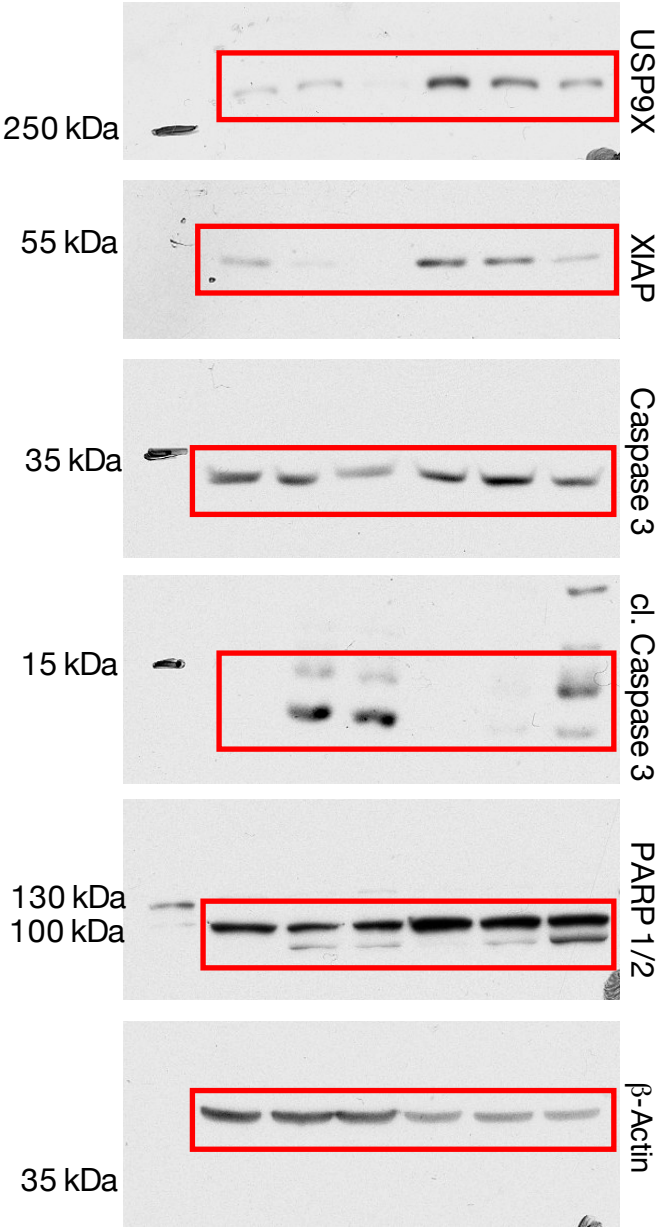

Supplement: EMMM-8-851-s007.pdf [file EMMM-8-851-s007.pdf]
